# Supplementary material
Source: PubMed Central journal article supplement (PMC3337974)

**Figure S1**

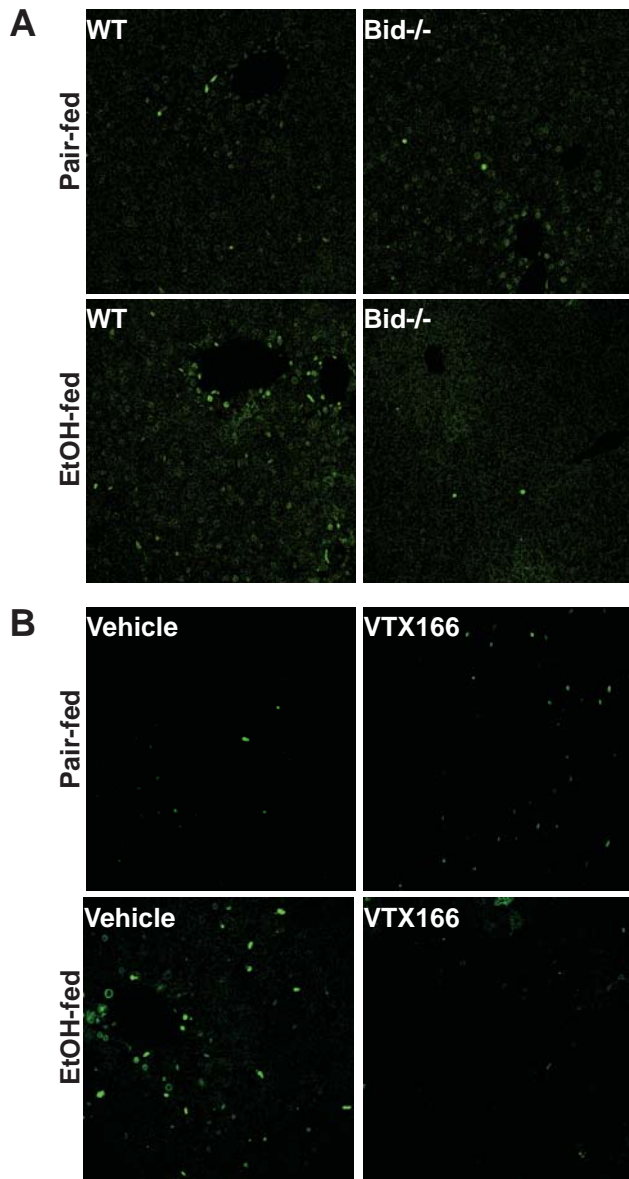

Supplement: NIHMS343432-supplement-Supp_Figure_S1.pdf [file NIHMS343432-supplement-Supp_Figure_S1.pdf]

Figure S2

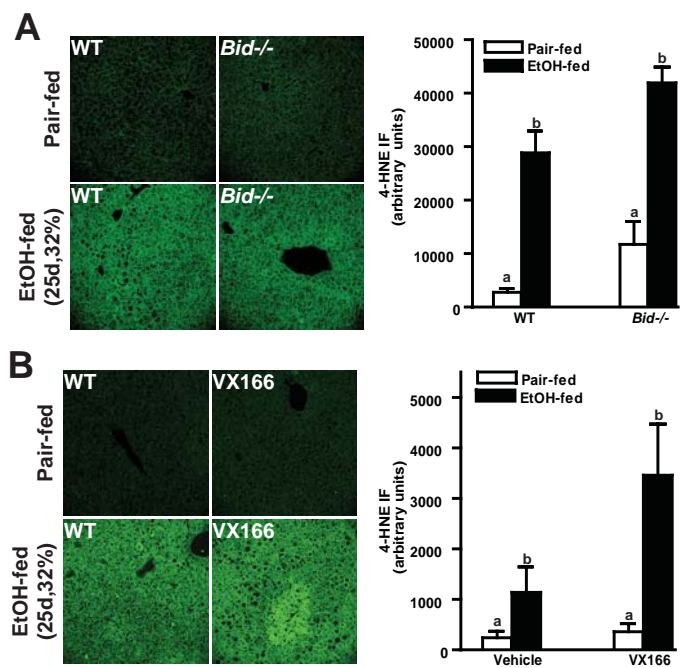

Supplement: NIHMS343432-supplement-Supp_Figure_S2.pdf [file NIHMS343432-supplement-Supp_Figure_S2.pdf]
